# Supplementary material for: Molecular diversity of extended-spectrum β-lactamases and carbapenemases, and antimicrobial resistance
Source: PubMed Central journal article supplement (PMC6988205; doi:10.1186/s40560-020-0429-6), 2020-01-28
Supplement: 40560_2020_429_MOESM2_ESM.pdf [file 40560_2020_429_MOESM2_ESM.pdf]

█ conserved key motif  
█ indicates positions which have a single, fully conserved residue  
█ indicates that one of the following 'strong' groups is fully conserved (>0.5 Gonnet Pam250 matrix)  
█ indicates that one of the following 'weaker' groups is fully conserved (≤0.5 Gonnet Pam250 matrix)

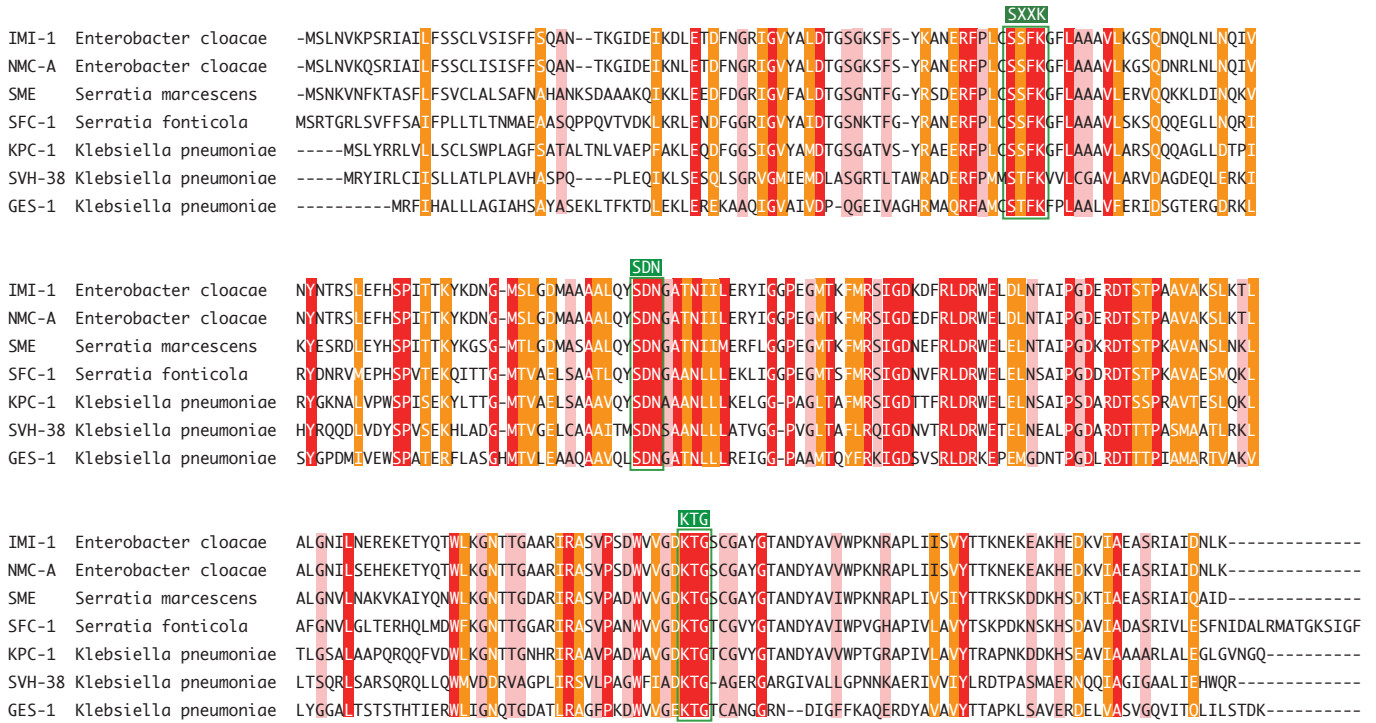

**Supplemental Fig. 2. The alignment of class A carbapenemases based on their primary sequences**  
 Characteristic features of class A  $\beta$ -lactamases are the tetrad motif S-X-X-K, the S-D-N triad, and the K-T-G triad, which contain the serine in the enzyme active site in their primary sequences. Based on the primary sequences, the tree was generated using Clustal Omega [32, 33, 34] of GenomeNet at Kyoto University Bioinformatics Center (<https://www.genome.jp/tools-bin/clustalw>).
