# Supplementary material for: Molecular diversity of extended-spectrum β-lactamases and carbapenemases, and antimicrobial resistance
Source: PubMed Central journal article supplement (PMC6988205; doi:10.1186/s40560-020-0429-6), 2020-01-28
Supplement: 40560_2020_429_MOESM4_ESM.pdf [file 40560_2020_429_MOESM4_ESM.pdf]

- conserved key motif
- indicates positions which have a single, fully conserved residue
- indicates that one of the following 'strong' groups is fully conserved (>0.5 Gonnet Pam250 matrix)
- indicates that one of the following 'weaker' groups is fully conserved (≤0.5 Gonnet Pam250 matrix)

Extended-spectrum  
cephalosporinase

Carbapenemase

|        |                                            |             |          |
|--------|--------------------------------------------|-------------|----------|
| OXA-10 | -----MKTFAAYVIIACLSSTALAGSITENTSWNKE       | FSAEAVNGVFL | CKSSS    |
| OXA-11 | -----MKTFAAYVIIACLSSTALAGSITENTSWNKE       | FSAEAVNGVFL | CKSSS    |
| OXA-5  | -----MKTIAAYLVLFYASTALSEISENLAWNKE         | FSSSEVHGVFL | CKSSS    |
| OXA-48 | -----MRVLALSAVFLVASIIGMPAVAKWQENKSWNAH     | FTEHKSQGVVL | WNENK    |
| OXA-23 | MNKYFTCYVVASLFLSGCTVQHNLINETSQIVOGHNQVIHQY | FDEKNTSGVLV | IQTDKK   |
| OXA-2  | -----MAIRIFAILFSIFSLATFAHAQEGTLERSDWRKF    | FSEFQAKGTIV | VADERQ   |
| OXA-15 | -----MAIRIFAILFSIFSLATFAHAQEGTLERSDWRKF    | FSEFQAKGTIV | VADERQ   |
| OXA-3  | -----MAIRIFAILFSTFVFGTFHAHQEGMRERSDWRKF    | FSEFQAKGTIV | VADERQ   |
| OXA-1  | -----MKNTIHHINFAIFLIANIISASASTDISTVASPL    | FEGTEG---   | CFLLYDAS |
| OXA-4  | -----MKNTIHHINFAIFLIANIISASASTDISTVASPL    | FEGTEG---   | CFLLYDVS |

SXXK

|        |                      |                       |                      |          |
|--------|----------------------|-----------------------|----------------------|----------|
| OXA-10 | KS--CATNDLARASKEYL   | PASTFKIPNAITIGLETGVIK | NEHQVFKWDGKPRAM      | KQWERDL  |
| OXA-11 | KS--CATNDLARASKEYL   | PASTFKIPNAITIGLETGVIK | NEHQVFKWDGKPRAM      | KQWERDL  |
| OXA-5  | NS--CTTNNAARASTAYIP  | PASTFKIPNALITGLTGAIK  | DERQVFKWDGKPRAM      | KQWEKDL  |
| OXA-48 | QQ--GFTNNLKRANQAFIP  | PASTFKIPNSLTALDLGVVK  | DEHQVFKWDGQTRD       | IATWNRDH |
| OXA-23 | IN--LYGNALS RANTEEYV | PASTFKVLNALTIGLEN-QKT | INEIFKWKGEKRSF       | TAWEKDM  |
| OXA-2  | ADRAMLVFDPVRSKKRYS   | PASTFKIPHTLFDALDAGAVR | DEFQIFRWDGVNRGF      | FAGHNQDQ |
| OXA-15 | ADRAMLVFDPVRSKKRYS   | PASTFKIPHTLFDALDAGAVR | DEFQIFRWDGVNRGF      | FAGHNQDQ |
| OXA-3  | TDRVILVFDQVRSKKRYS   | PASTFKIPHTLFDALDAGAAR | DEFQVFRWDGKIKRS      | AAHNQDQ  |
| OXA-1  | TNAEIAQFNKAKCATQMAP  | PDSTFKITALSMAFD       | AEIIDQKT-IFKWDKTPKGM | EIWNNSH  |
| OXA-4  | TNAEIAQFNKAKCATQMAP  | PDSTFKITALSMAFD       | AEIIDQKT-IFKWDKTPKGM | EIWNNSH  |

SVX

|        |          |                |              |                |            |         |       |
|--------|----------|----------------|--------------|----------------|------------|---------|-------|
| OXA-10 | TLRGATQV | SAVPVFOQIAREV  | GEVVRMOKYLK  | KFSYGNQNI      | SGGID----- | KFWLEGO | RLR   |
| OXA-11 | TLRGATQV | SAVPVFOQIAREV  | GEVVRMOKYLK  | KFSYGSQNI      | SGGID----- | KFWLEDO | RLR   |
| OXA-5  | KLRGATQV | SAVPVFOQIAREV  | GEIRMOKYLNL  | FSYGNANIG      | GGID-----  | KFWLEGO | RLR   |
| OXA-48 | NLITAMKY | SVVPVYQEFARQIG | EARMKMLHAFDY | GNEDISGNVD     | -----      | SFWLDGG | RLR   |
| OXA-23 | TLGEAMKL | SAVPVYQELARRIG | LDMQKEVKRIGF | GNAEIQQVD      | -----      | NFWLVGP | RLK   |
| OXA-2  | DLRSAMRN | STVWVYELFAKEI  | GD DKARRYLK  | KIDYGNADPST    | SNG-----   | DYWI    | EGSLA |
| OXA-15 | DLRSAMRN | STVWVYELFAKEI  | GD DKARRYLK  | KIDYGNADPST    | SNG-----   | DYWI    | EGSLA |
| OXA-3  | DLRSAMRN | STVWVYELFAKEI  | GEDKARRYLK   | KIDYGNADPST    | SNG-----   | DYWI    | DGNLA |
| OXA-1  | TPKTWQF  | SVWVYQEIITQIG  | LNKIKNYLKD   | FYGNQDFSGDKERN | NGLTEAW    | LESS    | RLK   |
| OXA-4  | TPKTWQF  | SVWVYQEIITQIG  | LNKIKNYLKD   | FYGNQDFSGDKERN | NGLTEAW    | LESS    | RLK   |

KTG

|        |           |            |                  |                 |            |                 |
|--------|-----------|------------|------------------|-----------------|------------|-----------------|
| OXA-10 | ISAVNOVE  | FLESYLNK   | SAS-KENQLIVKEALV | TEAAPEYL        | VHSKTG     | FSGVGTESNPGV    |
| OXA-11 | ISAVNOVE  | FLESYLNK   | SAS-KENQLIVKEALV | TEAAPEYL        | VHSKTG     | FSGVGTESNPGV    |
| OXA-5  | ISAFNOVK  | FLESYLN    | PAS-KANQLIVKEATV | TEATPEYI        | VHSKTG     | YSGVGTESSPGV    |
| OXA-48 | ISATEQIS  | FLRKL      | YHNKLHVS-ERSORI  | VQAMTEANGDYI    | IRAKTG     | YS---TRIEPKI    |
| OXA-23 | VTPIDQEV  | FVSQLAHTOL | PFS-EKVOAN       | VKNMLLLEESNGYK  | IFGKTG     | WA---MDIKPOV    |
| OXA-2  | ISAQEOTAF | FLRKL      | YRNEPFR-VEHORL   | VKDLMTVEAGRNI   | IRAKTG     | WEG-----RM      |
| OXA-15 | ISAQEOTAF | FLRKL      | YRNEPFR-VEHORL   | VKDLMTVEAGRNI   | IRAKTG     | WEG-----RM      |
| OXA-3  | ISAQEQIA  | FLRKL      | YHNEPFR-VEHORL   | VKDLMTVEAGRNI   | IRAKTG     | WEG-----RI      |
| OXA-1  | ISPEEQIQ  | FLRKL      | INHNL            | PVKNSAIENTIENMY | QDLNSTKLYG | KTGAGFT-ANRTLQN |
| OXA-4  | ISPEEQIQ  | FLRKL      | INHNL            | PVKNSAIENTIENMY | QDLNSTKLYG | KTGAGFT-ANRTLQN |

|        |      |              |                   |                  |                     |
|--------|------|--------------|-------------------|------------------|---------------------|
| OXA-10 | AWWG | WVEKET-EVYF  | FAFNMDIDN-ESKLPLR | KSIPTKIMESEGIIGG | -----               |
| OXA-11 | AWWG | WVEKET-EVYF  | FAFNMDIDN-ESKLPLR | KSIPTKIMESEGIIGG | -----               |
| OXA-5  | AWWG | WVEKGT-EVYF  | FAFNMDIDN-ESKLPSR | SISTKIMASEGIIGG  | -----               |
| OXA-48 | GWWG | WVELDD-NWFF  | AMNMDMPT-SDGLGLR  | DAITKEVLKQEKIIP  | -----               |
| OXA-23 | GWLT | GWVEQPDGKIVA | FALNMEMRS-EMPASIR | PELLMKS          | SLKQLNII-----       |
| OXA-2  | GWWG | WVEWPT-GSVF  | FALNIDTPNRMDDL    | FKRAIVRAILRSIEAL | PPNPAVNSDAAR        |
| OXA-15 | GWWG | WVEWPT-GSVF  | FALNIDTPNRMDDL    | FKRAIVRAILRSIEAL | PPNPAVNSDAAR        |
| OXA-3  | GWWG | WVEWPT-GPVF  | FALNIDTPNRMDDL    | FKRAIVRAILRSIEAL | PPNPAVNSDAAR        |
| OXA-1  | GWFE | GFIISKSGHKYV | FVSAL             | TGNLGSNLTSSII    | AKKNAITILNLTNL----- |
| OXA-4  | GWFE | GFIISKSGHKYV | FVSAL             | TGNLGSNLTSSII    | AKKNAITILNLTNL----- |

**Supplemental Fig. 4. Alignment of the class D  $\beta$ -lactamase OXA family (oxacillinase)**  
OXA-10, OXA-11, and OXA-15 are recognized as extended-spectrum cephalosporinases, whereas OXA-23 and OXA 48 are recognized as CHDLs. Class D  $\beta$ -lactamases retain the tetrad motif S-X-X-K (including the serine of the enzyme active site), the Y-G-N/S triad, and the K-S/T-G triad. Based on the primary sequences, the alignment was generated using Clustal Omega [32, 33, 34] of GenomeNet at Kyoto University Bioinformatics Center (<https://www.genome.jp/tools-bin/clustalw>).
