# Supplementary material for: Molecular diversity of extended-spectrum β-lactamases and carbapenemases, and antimicrobial resistance
Source: PubMed Central journal article supplement (PMC6988205; doi:10.1186/s40560-020-0429-6), 2020-01-28
Supplement: 40560_2020_429_MOESM5_ESM.pdf [file 40560_2020_429_MOESM5_ESM.pdf]

- conserved key motif
- indicates positions which have a single, fully conserved residue
- indicates that one of the following 'strong' groups is fully conserved (>0.5 Gonnet Pam250 matrix)
- indicates that one of the following 'weaker' groups is fully conserved (≤0.5 Gonnet Pam250 matrix)

```

VIM-1  ----MLKVSSLLVYMTASVMAVASPLAHSGEPSGEY-P-----TVNEIPVGE-VLYQIADGWSHIATQSFDFG-AVYPSNGLIVRDGDELLIDTAWGAKNTAAAEIEKQIGLPV
NDM-1  MELPNIMHPVAKLST-----ALAAALMLSGCMPGEIRPTIGQQMETGDRQFVFRQLAPNWHQHTSYLDMPGFGAVASNGLIVRDGGRVLDVTAWTDDQTAQILNWKIQEINLPV
IND-1  -----VKKSIKRFIVS--ILLSPFASAQVKDFVI-----EPPI----KNNHIYKTFGVFVGGKEY-SANSMYLVTKKGVVLDVVPWEKIYQSLVDTIKKRHLNLPV
SPM    MNSPKSRALLGFMGAFCLLL--VAGAPLSAKSSDHVDL-----PYNLTATKIDSDV FVVTDTRDFYSSNVLVA----KMLDGTVVIVSSPFENLGTQTLVQWVAKTMKPKK
KMH-1  -----MKALVISFGLLL--FTNMVCAEDSL-----PELDIQKIEDGYYLTAYEKIEGWLVGSNGLVLDNKNAYLIDTPISATDTEKLVKWIADQGF-TA
IMP-1  -----NKLKSVFFIFL--FCSIATAAESL-----PDLKIEKLEDEGYVHTSFEEVNGWVVPKHGLVVLVNAEAYLIDTPFTAKDTEKLVWTFVERGY-KI
SIM-1  -----VRTLILCLFG--TLNTAFEEAQ-----PDLKIEKIEEGYLTHTSFQYKFGIVKQGLVLDNKHAYLIDTPASAGDTEKLVNWKLEKDF-TV
DIM-1  -----VRTHFTALLLL--FSLSSLANDEV-----PELRIEKVKENIFLHTSYSRVNGFGLVSSNGLVVIDKGNAFIVDTPWSDRDTETLVHWIRKNGY-EL
GIM-1  -----MKNVLVFLILL--VALPALAQGHK-----PLEVIKIEDGYLHTSFKNIEGYGLVDSNGLVLDNNAQYVLDTPWSEEDTKLLSWATDRGY-QV

```

```

VIM-1  TRAVSTHFDHDDRVGGVDVLRRAAGVATYASPSSTRRAEAEAGNEIP-----THSL----EGLSSGDAVRFVGPVELFPGAAHSDNLDLVVYVPSANVLYGGCA
NDM-1  ALAVVTHAHQDKMGMDALHAAGIATYANALSNQAPQEGMVAA-----QHSLTFAANGWVEPATAPNFGPLKVFVPGPGHTSDNITVIGDGTDIADFGGCL
IND-1  VAVFATHSHDDRAGDLFFNNKGIKTYATAKTNEFLKKGDKATS-----TE--IIKT----GKPYRIGGEEFVVDLLEGHTADNVVWVFPKYNVLDGGCL
SPM    VVAINTHFDLDTGGNEIYKMGAEIWSDDLTKQLREENKDRIKAAEFYKNEDLKRRILSSHVPADNVFDLKQ----GKVFSSNELVEVSPGAPHSDDNVVYVFPKYLFGGCM
KMH-1  KASISTHFDHDDSTGGIAFLNSKSIPTYASKLTNQLKNGGEEQA-----THS--FG----KNPYWLLKKNKIEAFVPGAGHTPDNLVWVLPKQKILFGGCF
IMP-1  KGISSSHFDSDTGGIEWLSRSIPTYASELTNEFLKKGDKVQA-----TNS--FS----GVNYWLVKNKIEVFPVPGHTPDNVVWVLPKILFGGCF
SIM-1  NGSISTHFDHDDSTAGIEWLNKSIPTYASKLTNEFLKNGKTQA-----KHS--FD----KESFWLVKNKIEIFVPGGHTPDNVVWVLPKSKILFGGCF
DIM-1  LGSVSTHFDHEDRTAGIKWLNQDSISTYATTSTNHLKNGKKEPA-----KYT--LK----GNESTLVDGLIEVFPVGGHTPDNVVWVLPKSKILFGGCF
GIM-1  MASISTHFDHEDRTAGIKLLNSKSIPTYSELTKLLAREGKVPV-----THY--FK----DDEFTLGNGLIELYVPGAGHTPDNIVAWLPKSKILFGGCL

```

```

VIM-1  VHELSSTSAGNVADLAEIPTSVERIQKHYPEAEVVIPIGHLPGGLDLQHTANVVKAHKNRSVAE-----
NDM-1  IKDSKAKSLGNLGDADTEHVAASARAFGAAPKASVIVMSSHAPSRAALHTIARMADKLR-----
IND-1  VKSNSATDLGYIKEANVEQPKIINKLKAKYSKATLITPGHDEWKGGGHVEHTLELLNKK-----
SPM    IKP---KELGYLGDANVKAIPDSARRL--KKFDAKIVIPGHGEWGGPEMVKTIKVAEKAVGEMRL-----
KMH-1  VKP---EGLGNLSHAVIAEIPASAEKLIARYSNATMVVPGHGKVGDAASLLEKTRQRAVEALAANK-----
IMP-1  IKP---YGLGNLGDANIEAIPKSAKLLKSKYKAKLVVPSHSEVGDASLKLTLQAVKGLNESKKPSKPSN--
SIM-1  IKP---NGLGNLSDANLEAIPGSAKKMISKYSKAKLVIPSHSEIGDASLKLTLWEQAIKGLNESKPPPLIN--
DIM-1  VRSLDSEGLGYTGEAHIDQVSRSAQNALSRYSEAQIVIPGHGKIGDIALKHTKSLAETASNKSIQPNANASAD
GIM-1  VRSHWEGLGYVGDASSISSIADSIKNIIVSKYPIQVVVPGHGKVGSSDIIDHTIDLAESA236SNKLMQPTAEASAD

```

## Supplemental Fig. 5. Alignment of the class B metallo-β-lactamase family and their zinc enzymatic active center

The level of amino acid identity between groups was as low as 20% or less. As a feature of class B β-lactamases, the binding site for Zn<sup>2+</sup> at the enzymatic active site involves three histidines (His116, His118, and His196). Based on the primary sequences, the alignment was generated using Clustal Omega [32, 33, 34] of GenomeNet at Kyoto University Bioinformatics Center (<https://www.genome.jp/tools-bin/clustalw>).
