# Supplementary material for: Molecular diversity of extended-spectrum β-lactamases and carbapenemases, and antimicrobial resistance
Source: PubMed Central journal article supplement (PMC6988205; doi:10.1186/s40560-020-0429-6), 2020-01-28
Supplement: 40560_2020_429_MOESM6_ESM.pdf [file 40560_2020_429_MOESM6_ESM.pdf]

\* indicates positions which have a single, fully conserved residue  
 : indicates that one of the following 'strong' groups is fully conserved (>0.5 Gonnet Pam250 matrix)  
 . indicates that one of the following 'weaker' groups is fully conserved (≤0.5 Gonnet Pam250 matrix)

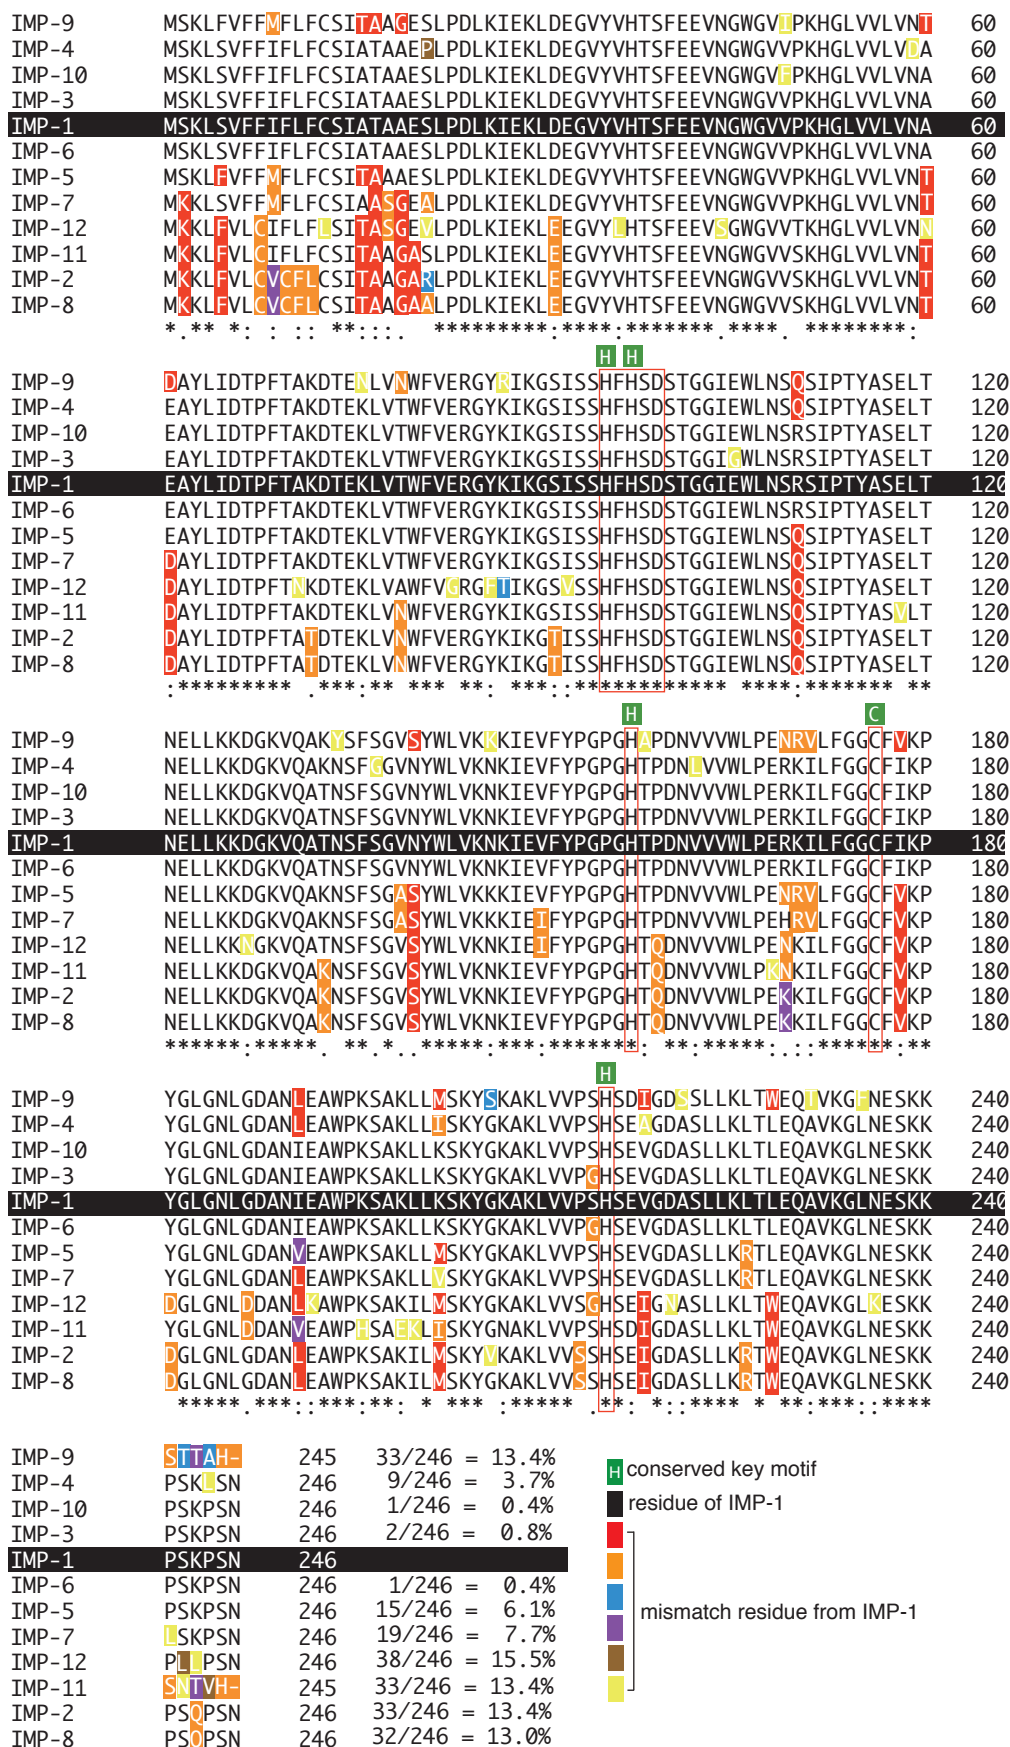

### Supplemental Fig. 6. The alignment of primary sequences of the class B metallo-β-lactamase IMP family

Primary sequence variations as evidenced by the alignment of IMP-type MBLs. The binding site for Zn<sup>2+</sup> at the enzymatic active site involves three histidines at the amino-terminal side. Based on the primary sequences, the alignment was generated using Clustal Omega [32, 33, 34] of GenomeNet at Kyoto University Bioinformatics Center (<https://www.genome.jp/tools-bin/clustalw>).
